# Supplementary material
Source: PubMed Central journal article supplement (PMC3652887)
Supplement: jn.113.175422_nutrition175422SupplementaryData.pdf [file jn.113.175422_nutrition175422SupplementaryData.pdf]

**Supplemental Table 1. The factor loadings of the 3 major principal component factors of fatty acids in postmenopausal women from the Women's Health Initiative – Observational Study (WHI-OS) (*n* = 93,676)**

| <b>Fatty acid</b>       | <b>Factor 1:<br/>SMSFA</b> | <b>Factor 2:<br/>Plant source FA</b> | <b>Factor 3:<br/>Marine source FA</b> |
|-------------------------|----------------------------|--------------------------------------|---------------------------------------|
| Butyric acid (4:0)      | <b>0.94</b>                | 0.15                                 | 0.05                                  |
| Hexanoic acid (6:0)     | <b>0.94</b>                | 0.11                                 | 0.03                                  |
| Octanoic acid (8:0)     | <b>0.94</b>                | 0.15                                 | 0.04                                  |
| Decanoic acid (10:0)    | <b>0.96</b>                | 0.15                                 | 0.05                                  |
| Lauric acid (12:0)      | <b>0.85</b>                | 0.22                                 | 0.03                                  |
| Myristic acid (14:0)    | <b>0.94</b>                | 0.25                                 | 0.12                                  |
| Palmitic acid (16:0)    | 0.81                       | 0.21                                 | 0.21                                  |
| Margaric acid (17:0)    | 0.81                       | 0.08                                 | 0.08                                  |
| Stearic acid (18:0)     | 0.80                       | 0.48                                 | 0.19                                  |
| Arachidic acid (20:0)   | 0.33                       | <b>0.86</b>                          | 0.08                                  |
| Behenic acid (22:0)     | 0.05                       | 0.81                                 | -0.04                                 |
| Myristoleic acid (14:1) | 0.64                       | 0.34                                 | 0.12                                  |
| Palmitoleic acid (16:1) | 0.74                       | 0.44                                 | 0.32                                  |
| Oleic acid (18:1)       | 0.64                       | 0.68                                 | 0.22                                  |
| Gadoleic acid (20:1)    | 0.35                       | <b>0.85</b>                          | 0.27                                  |
| Erucic acid (22:1)      | 0.11                       | 0.48                                 | 0.50                                  |
| Linoleic acid (18:2)    | 0.49                       | 0.74                                 | 0.22                                  |
| Linolenic acid (18:3)   | 0.48                       | 0.65                                 | 0.27                                  |
| Parinaric acid (18:4)   | 0.08                       | 0.09                                 | 0.60                                  |
| Arachidonic acid (20:4) | 0.38                       | 0.33                                 | 0.62                                  |
| EPA (20:5)              | 0.04                       | 0.05                                 | <b>0.95</b>                           |
| DPA (22:5)              | 0.06                       | 0.09                                 | <b>0.95</b>                           |
| DHA (22:6)              | 0.01                       | 0.06                                 | <b>0.93</b>                           |

Three factors explained 85.6% of total variance. Boldface shows factors loadings  $\geq 0.85$ . DHA: docosahexaenoic acid; DPA: docosapentaenoic acid; EPA: eicosapentaenoic acid; FA: fatty acid; SMSFA: short-to-medium chain saturated fatty acids.

**Supplemental Table 2. Peripheral leukocyte telomere length according to quartiles of individual dietary unsaturated fatty acids intake in a subsample of postmenopausal women from the Women's Health Initiative<sup>1</sup>**

|                                      | Dietary unsaturated FA intake |                   |                   |                   | <i>P</i> -trend <sup>2</sup> |
|--------------------------------------|-------------------------------|-------------------|-------------------|-------------------|------------------------------|
|                                      | Quartile 1                    | Quartile 2        | Quartile 3        | Quartile 4        |                              |
| Myristoleic acid (14:1), % of energy | 0.01                          | 0.02              | 0.03              | 0.04              |                              |
| Model 1                              | 4.07 (3.99, 4.16)             | 4.12 (4.03, 4.20) | 4.01 (3.92, 4.09) | 4.02 (3.94, 4.11) | 0.19                         |
| Model 2                              | 4.06 (3.95, 4.17)             | 4.14 (4.03, 4.25) | 4.06 (3.95, 4.16) | 4.08 (3.97, 4.19) | 0.86                         |
| Palmitoleic acid (16:1), % of energy | 0.29                          | 0.43              | 0.54              | 0.70              |                              |
| Model 1                              | 4.09 (4.00, 4.17)             | 4.10 (4.01, 4.18) | 4.02 (3.93, 4.10) | 4.02 (3.93, 4.10) | 0.14                         |
| Model 2                              | 4.13 (4.02, 4.24)             | 4.14 (4.03, 4.25) | 4.07 (3.96, 4.17) | 4.02 (3.91, 4.13) | 0.08                         |
| Oleic acid (18:1), % of energy       | 7.29                          | 9.77              | 12.10             | 15.08             |                              |
| Model 1                              | 4.07 (3.99, 4.16)             | 4.00 (3.91, 4.08) | 4.14 (4.06, 4.23) | 4.01 (3.92, 4.09) | 0.70                         |
| Model 2                              | 4.12 (4.01, 4.24)             | 4.05 (3.94, 4.16) | 4.18 (4.07, 4.29) | 4.01 (3.90, 4.12) | 0.32                         |
| Gadoleic acid (20:1), % of energy    | 0.05                          | 0.07              | 0.10              | 0.14              |                              |
| Model 1                              | 4.02 (3.93, 4.10)             | 4.06 (3.97, 4.14) | 4.06 (3.97, 4.14) | 4.09 (4.00, 4.18) | 0.27                         |
| Model 2                              | 4.07 (3.95, 4.18)             | 4.11 (4.00, 4.22) | 4.09 (3.98, 4.20) | 4.08 (3.98, 4.19) | 0.90                         |
| Erucic acid (22:1), % of energy      | 0.003                         | 0.006             | 0.01              | 0.02              |                              |
| Model 1                              | 4.03 (3.94, 4.12)             | 4.07 (3.98, 4.15) | 4.06 (3.98, 4.15) | 4.06 (3.98, 4.15) | 0.74                         |
| Model 2                              | 4.08 (3.97, 4.19)             | 4.12 (4.01, 4.23) | 4.09 (3.98, 4.20) | 4.06 (3.96, 4.17) | 0.54                         |
| Linoleic acid (18:2), % of energy    | 3.77                          | 5.06              | 6.19              | 8.21              |                              |
| Model 1                              | 4.06 (3.98, 4.15)             | 4.05 (3.97, 4.14) | 4.05 (3.97, 4.14) | 4.05 (3.97, 4.14) | 0.87                         |
| Model 2                              | 4.11 (3.99, 4.22)             | 4.09 (3.98, 4.20) | 4.10 (3.99, 4.21) | 4.06 (3.95, 4.17) | 0.51                         |
| Linolenic acid (18:3), % of energy   | 0.43                          | 0.58              | 0.75              | 1.03              |                              |
| Model 1                              | 4.07 (3.99, 4.16)             | 4.07 (3.98, 4.15) | 4.04 (3.95, 4.12) | 4.04 (3.96, 4.13) | 0.58                         |
| Model 2                              | 4.14 (4.02, 4.25)             | 4.12 (4.01, 4.23) | 4.07 (3.96, 4.18) | 4.04 (3.93, 4.15) | 0.11                         |
| Parinaric acid (18:4), % of energy   | 0.0001                        | 0.0005            | 0.001             | 0.003             |                              |
| Model 1                              | 4.12 (4.04, 4.21)             | 3.98 (3.90, 4.07) | 4.04 (3.95, 4.12) | 4.07 (3.99, 4.16) | 0.99                         |
| Model 2                              | 4.12 (4.01, 4.23)             | 4.02 (3.92, 4.13) | 4.09 (3.98, 4.20) | 4.11 (4.00, 4.22) | 0.67                         |
| Arachidonic acid (20:4), % of energy | 0.03                          | 0.04              | 0.06              | 0.09              |                              |
| Model 1                              | 3.97 (3.89, 4.06)             | 4.07 (3.99, 4.16) | 4.06 (3.97, 4.14) | 4.12 (4.03, 4.20) | 0.038                        |
| Model 2                              | 4.02 (3.91, 4.14)             | 4.12 (4.01, 4.23) | 4.11 (4.00, 4.21) | 4.10 (3.99, 4.21) | 0.44                         |
| EPA (20:5), % of energy              | 0.005                         | 0.01              | 0.03              | 0.05              |                              |
| Model 1                              | 4.04 (3.96, 4.13)             | 4.07 (3.99, 4.16) | 4.07 (3.99, 4.16) | 4.03 (3.94, 4.12) | 0.70                         |
| Model 2                              | 4.10 (3.98, 4.21)             | 4.14 (4.03, 4.25) | 4.10 (3.99, 4.20) | 4.03 (3.92, 4.14) | 0.21                         |
| DPA (22:5), % of energy              | 0.003                         | 0.006             | 0.01              | 0.02              |                              |
| Model 1                              | 4.06 (3.98, 4.15)             | 4.06 (3.97, 4.15) | 4.06 (3.97, 4.14) | 4.04 (3.95, 4.12) | 0.65                         |
| Model 2                              | 4.13 (4.02, 4.24)             | 4.12 (4.02, 4.23) | 4.10 (3.99, 4.21) | 4.01 (3.89, 4.12) | 0.06                         |
| DHA (22:6), % of energy              | 0.01                          | 0.03              | 0.05              | 0.09              |                              |
| Model 1                              | 4.03 (3.95, 4.12)             | 4.08 (4.00, 4.17) | 4.03 (3.95, 4.12) | 4.07 (3.98, 4.16) | 0.74                         |
| Model 2                              | 4.09 (3.97, 4.20)             | 4.14 (4.03, 4.25) | 4.06 (3.96, 4.17) | 4.06 (3.95, 4.17) | 0.43                         |

EPA: eicosapentaenoic acid; DPA: docosapentaenoic acid; DHA: docosahexaenoic acid; FA: fatty acid.

<sup>1</sup> Values for telomere length are least-square means (95% CIs). Values for each FA are median intakes of the FA according to quartiles. Model 1: adjusted for age (years, continuous). Model 2: adjusted for age (years, continuous), race/ethnicity (white, black, Hispanic, Asian/Pacific Islander), BMI ( $\leq 25$ ,  $>25$  to  $30$ ,  $>30$  to  $35$ ,  $>35$  kg/m<sup>2</sup>), smoking (never, former, current smoker), daily alcohol intake ( $\leq 0.01$ ,  $>0.01$  to  $0.1$ ,  $>0.1$  to  $2$ ,  $>2$  g/d), diabetes case in the primary case-control study (yes, no), physical activity ( $0$ ,  $>0$  to  $5$ ,  $>5$  to  $20$ ,  $>20$  metabolic equivalent hours/wk), daily energy intake (kcal, continuous), daily fruits and vegetables intake (medium serving [ $\sim 170$  g], continuous), daily vitamin C intake (mg, continuous), daily vitamin E intake (IU, continuous), daily selenium intake ( $\mu$ g, continuous), and daily  $\beta$ -carotene intake ( $\mu$ g, continuous).

<sup>2</sup> *P* values for linear trend are obtained by including the median intake levels of each quartile as continuous variables in the regression models.
